# Supplementary material for: Sediment characteristics as an important factor for revealing carbon storage in &lt;i&gt;Zostera marina&lt;/i&gt; meadows: a comparison of four European areas
Source: Copernicus journal article supplement (doi:10.5194/bg-2016-137), 2016-05-10
Supplement: Supplementary file [file bg-2016-137-AC1-supplement.pdf]

1 Sediment characteristics as an important factor for revealing carbon  
2 storage in *Zostera marina* meadows: a comparison of four European  
3 areas

4  
5 Martin Dahl<sup>1\*</sup>, Diana Deyanova<sup>1</sup>, Silvia Gütschow<sup>1</sup>, Maria E. Asplund<sup>2</sup>, Liberatus D. Lyimo<sup>1,3</sup>,  
6 Ventzislav Karamfilov<sup>4</sup>, Rui Santos<sup>5</sup>, Mats Björk<sup>1</sup>, Martin Gullström<sup>1</sup>

7  
8 <sup>1</sup> Seagrass Ecology & Physiology Research Group, Department of Ecology, Environment and Plant Sciences, Stockholm  
9 University, SE-106 91 Stockholm, Sweden

10 <sup>2</sup> The Sven Lovén Center for Marine Sciences, University of Gothenburg, Kristineberg 566, SE-451 78 Fiskebäckskil,  
11 Sweden

12 <sup>3</sup> School of Biological Science, University of Dodoma, Box 338 Dodoma, Tanzania

13 <sup>4</sup> Institute for Biodiversity and Ecosystem Research at the Bulgarian Academy of Sciences, 2, Gagarin Street, 1113  
14 Sofia, Bulgaria

15 <sup>5</sup> ALGAE -Marine Ecology Research Group, CCMar - Center of Marine Sciences, Faro, Portugal

16  
17 \*Correspondence author. E-mail: [martin.dahl@su.se](mailto:martin.dahl@su.se)

18

19

20 **Abstract.** The seagrass ecosystem is an important natural carbon sink but the efficiency varies greatly depending on  
21 species composition and environmental conditions. What causes this variation is not fully known and could have  
22 important implications for management and protection of the seagrass habitat to continue to act as a natural carbon  
23 sink. Here, we assessed sedimentary organic carbon in *Zostera marina* meadows (and adjacent unvegetated sediment)  
24 in four distinct areas of Europe (Gullmar Fjord on the Swedish west coast, Askö in the Baltic Sea, Sozopol in Black Sea  
25 and Ria Formosa in southern Portugal) down to ~35 cm depth. We also tested how sedimentary organic carbon in *Z.*  
26 *marina* meadows relates to different sediment characteristics, a range of seagrass-associated variables and water  
27 depth. The carbon storage varied among areas, where the Gullmar Fjord had a 15 times higher carbon storage  
28 compared to Askö and Sozopol. **We found that a high proportion of fine grain size, high porosity and low density of the**  
29 **sediment is strongly related to high carbon content in *Z. marina* sediment.** We suggest that sediment characteristics  
30 should be highlighted as an important factor when evaluating high priority areas in management of *Z. marina* generated  
31 carbon sinks.

32

33 Keywords: Carbon storage variability, *Zostera marina*, grain size, sediment characteristics, natural carbon sinks.

34

## 35 1. Introduction

36

37 Seagrass ecosystems are considered highly efficient natural carbon sinks (Mcleod et al., 2011) but there is a large  
38 variation in the capacity to store carbon, depending on species composition and habitat characteristics (Lavery et al.,  
39 2013; Rozaimi et al., 2013). While the carbon sequestration efficiency is quite well documented for many seagrass  
40 species (e.g. Kennedy *et al.*, 2010; Fourqurean *et al.*, 2012) the effects of different factors influencing intraspecific  
41 variation has only recently been investigated. To get a more accurate estimate of the global seagrass carbon sink  
42 capacity cause-effect relationships need to be better understood, and as seagrass loss is accelerating (Waycott *et al.*,  
43 2009) information on habitat characteristics affecting carbon storage are of importance for an efficient protection and  
44 management strategy to increase carbon storage capacity (Duarte et al., 2011).

45

46 There are several environmental factors (e.g. water depth and hydrodynamic processes) and seagrass habitat variables  
47 (e.g. canopy height and shoot density) that influence the carbon storage in seagrass sediments (Samper-Villarreal et al.,  
48 2016). For example, seagrass meadows at shallower depths are known to have a high accumulation of sedimentary  
49 carbon (Serrano et al., 2015), which could be associated with higher primary production and larger standing biomass  
50 stock (Serrano et al., 2014). Dense meadows have the ability to stabilize the sediment (and thereby preventing it from  
51 eroding) (Suykerbuyk et al., 2015) and seagrass habitats with a high canopy can trap a high amount of suspended  
52 particles and thus potentially increase the sedimentation of organic matter (Fonseca and Cahalan, 1992; Hendriks et  
53 al., 2008). Further, as the belowground biomass largely contributes to the carbon storage due to its high production,  
54 fast turnover and higher decay-resistant lignin content compared to the leaves (Duarte et al., 1998; Klap et al., 2000) a  
55 large root-rhizome system could render a higher carbon storage (Kenworthy and Thayer, 1984). In the coastal  
56 environment, sediment grain size is known to influence the aggregation of organic particles with finer grain sizes  
57 increasing the organic matter content of the sediment (Mayer, 1994b) . By reducing water velocity and facilitating  
58 sedimentation processes a seagrass meadow could increase the amount of fine particles, which thus promote a high  
59 carbon storage. Grain size has recently been shown to influence carbon storage in some seagrass areas (Röhr et al.,

60 2016, Serrano et al., 2016), especially in meadows with a low contribution of autochthonous derived carbon, although  
61 the influence of grain size on carbon storage is not universal for all seagrass species and habitats (Serrano et al., 2016).  
62 Grain size is also strongly related to sediment porosity and density, which influence the oxygen conditions in the  
63 sediment. Oxygen levels together with the microbial community composition, biomass carbon and nutrient content are  
64 important factors for the degradation rate of organic matter in the sediment (Benner et al., 1984; Deming and Harass,  
65 1993; Enriquez et al., 1993) and therefore influencing the carbon sequestration process.

66  
67 *Zostera marina* L. is the most widely spread seagrass species in the northern hemisphere, with a distribution in Europe  
68 stretching from the southern Black Sea and the gulf of Cádiz (southern Portugal) up to Iceland and the northern parts  
69 of Norway (Green and Short, 2003). The plant biomass is generally larger at higher latitudes (Short et al., 2007) because  
70 of more optimal growth temperatures (Moore and Short, 2003). Large seagrass populations can be found along the  
71 Swedish west coast and at the east coast of Denmark (Baden and Boström, 2001; Olesen and Sand-Jensen, 1994), where  
72 they form extensive meadows with shoots over 1 m in length. Due to its wide distribution *Z. marina* populations have  
73 adapted to a large range of environmental conditions, with potential differences in carbon storage capacity. The species  
74 can tolerate salinity ranging from 5 to 35 (Boström et al., 2003) and a depth distribution from the intertidal down to  
75 30 m depending on water clarity (Phillips and Meñez, 1988). *Zostera marina* also grows in various substrates, from  
76 coarser stone-sand bottoms to finer silt and clay sediment. In this study, we aim to assess and compare carbon storage  
77 in *Z. marina* meadows at four different areas in Europe as well as to examine relationships between sediment organic  
78 carbon content and several explanatory predictors including seagrass structural complexity, carbon and nitrogen  
79 content of the seagrass biomass and sediment characteristics (i.e. sediment porosity and density, and grain size) in  
80 order to determine factors influencing the storage capacity of *Z. marina* meadows in these areas.

81

## 82 2. Methods

83

### 84 2.1 Study sites

85

86 This study was conducted in four different areas in Europe (the Swedish Skagerrak and Baltic coasts, Black Sea in  
87 Bulgaria and the southern coast of Portugal; Table 1 and Fig. 1) from June to October 2013 with one complimentary  
88 field sampling performed in October 2014. **The different study areas cover a range of environmental and physical  
89 conditions (e. g. salinity and temperature) for *Z. marina* in Europe.** In each area, two meadows and one unvegetated  
90 area (reference site) were sampled, except for Portugal with one additional unvegetated area and the Baltic Sea where  
91 one meadow and one unvegetated area were added (Table 1). The sampling on the Swedish west coast were carried  
92 out off the Sven Lovén Centre for Marine Sciences – Kristineberg in the Gullmar Fjord (58°20'N, 11°33'E; Table 1). The  
93 area is comprised of small islands and shallow bays making it highly productive and a suitable environment for seagrass  
94 growth with many sheltered soft bottoms covered by extended *Z. marina* beds. In the Baltic Sea, samples were collected  
95 in the area around the Askö Laboratory in Stockholm Archipelago (58°49'N, 17°39'E). The Baltic Sea is a brackish water  
96 system and the salinity is about 5-6 outside Askö, which is on the distribution limit for *Z. marina* (Boström et al., 2003).  
97 Low salinity is known to negatively affect production and growth of the plant (Salo et al., 2014). In the Baltic Sea, *Z.*  
98 *marina* grows at approximately 2-5 m depths (sometimes together with *Ruppia maritima*) and on more coarse  
99 sediment compared to the Skagerrak area (Baden and Boström, 2001). In the Black Sea, sampling was carried out in  
100 two sites around the Laboratory of Marine Ecology in Sozopol, Bulgaria (42°25'N, 27°41'E). The salinity is around 17  
101 and commonly *Z. marina* grows in mixed stands with *Z. noltii*. The Ropotamo (Rt) site is situated in the vicinity of the  
102 Ropotamo river mouth. Ria Formosa (Algarve Marine Sciences Centre – Faro) is located in southern Portugal (36°59'N,  
103 7°52'W) and is a coastal lagoon with large intertidal areas and a tidal fluctuation of 2-3 m. This is the only area in the  
104 present study with pronounced tidal variation, and the water depth for the Portugal sites was standardized to mean  
105 low water (MLW) by calculating the difference between the measured water depth and the tide at the time of  
106 measurement. The tide values were obtained from Ria Formosa tidal station (Faro-Olhão) with the mean water level

107 as reference depth. Ria Formosa is a lagoon with scarce *Z. marina* distribution (which at times grows together with  
108 *Cymodocea nodosa*) and apart from one other area in Portugal (Óbidos Lagoon) the only one that still harbor *Z. marina*,  
109 which has decreased drastically during the past 20 years (Cunha et al., 2013).

## 111 2.2 Sediment sampling and biometrical measurements

112  
113 At each site, six sediment cores were taken with a push corer (h=50 cm,  $\varnothing$  =8 cm) at a distance of 10-30 m apart from  
114 each other. The edge of the corer was sharpened to easier press down the core into the sediment and to reduce the  
115 shortening (compression) of the sediment collected (Serrano *et al.*, 2012). However, due to the difference in sediment  
116 compactness between sites the length of the sediment core varied (because of difficulties in pressing down the core in  
117 coarser sediment). Each core was sliced into a maximum of six segments (0-2.5 cm, 2.5-5 cm, 5-12.5 cm, 12.5-25 cm,  
118 25-37.5 cm, 37.5-45 cm) with the majority of samples lacking the deepest segment. The corers were stored vertical  
119 prior to slicing the sediment into depth segments. We examined the influence of core shortening in the Skagerrak area,  
120 where the compression is expected to be the highest in our study due to the soft sediment and high porosity (Glew *et*  
121 *al.*, 2001), by measuring the length of the outer and inner edge of the corer from the edge of the core to the sediment  
122 surface when pressed down into the sediment (n=6). The effect of core shortening was derived from the difference  
123 between the inner and outer length of the corer and compression was calculated to be 8 %. This has not been corrected  
124 for in the data and is further addressed in the discussion as a source of error. Within a few meters from each core at  
125 the seagrass sites, shoot height (cm, n=20) was measured, percentage seagrass coverage (n=10) were estimated (in 0.5  
126 x 0.5 m squares) and biomass samples (n=3) were collected (0.25 x 0.25 m). The biomass samples were used for  
127 estimating above- and belowground seagrass biomass (as dry weight) and for counting number of shoots. Before  
128 weighing the seagrass was cleaned and epiphytes removed, and the dry weight was measured after 24-48 h in 60°C  
129 until constant weight. One out of the three biomass samples collected around each core were analyzed for carbon and  
130 nitrogen content (n = 6 for each meadow). The sediment samples were cleaned from roots and rhizomes, larger shells  
131 and benthic organisms, and homogenized prior of drying. The sediment was dried in 60°C for approximately 48 h until

132 the weight was constant. Before drying a sediment sample it was divided into two subsamples, one for analysis of  
133 carbon and nitrogen content, and the other for grain size analysis. A mixing mill (Retch 400 mm) was used to grind the  
134 sediment into a fine powder to further homogenize the subsample used for analysis of carbon and nitrogen content.  
135 The carbon and nitrogen contents in biomass and sediment were analyzed using an organic elemental analyzer (Flash  
136 2000, Thermo Fischer scientific). Prior to analysis for  $C_{org}$  content the sediment samples were pre-treated with 1 M HCl  
137 (direct addition until the reaction of carbonate was complete) to remove inorganic carbon and dried at 60°C for 24 h.  
138 Total nitrogen ( $N_T$ ) was derived from untreated sediment samples was used to estimate the nitrogen content due to  
139 possible alteration of the nitrogen values when treated with HCl (Harris et al., 2001). Sediment porosity was given as  
140 percentage (%) by calculating sediment wet weight minus dry weight divided by the sample volume, whereas sediment  
141 density ( $g\ DW\ mL^{-1}$ ) was derived from dividing the dry weight of the sediment by the volume of the sample. A literature  
142 survey for measurements of sediment carbon content in *Z. marina* meadows in Europe and other temperate regions  
143 was conducted using Web of Science and Google Scholar with the search words “*Zostera marina*, sediment, organic”.  
144 Additionally, grey literature including thesis work was also used as well as unpublished data from colleagues.

145

### 146 2.3 Grain size analysis

147

148 Three sediment cores in each habitat were used for particle size analysis and each depth section was separately  
149 analyzed. Prior to analysis the total dry weight of sediment for each section was determined and 100 ml of 0.05 M  
150  $Na_4P_2O_7$  was added to break down aggregates of clay particles. All of the sediment samples were dry-sieved for 10 min  
151 using a sieving tower (CISA electromagnetic sieve shaker, Spain) (including sieves of 0.074 mm, 0.125 mm, 0.25 mm,  
152 0.5 mm, 1 mm and 2 mm) and the sediment of each sieve was weighed to determine the weight of the separate fractions  
153 (the average weight of the samples was 97 g). In depth sections with high organic carbon content (>0.5%), the organic  
154 matter was removed prior to dry sieving, through oxidation with 35%  $H_2O_2$ , as the organic matter content leads to  
155 aggregation of particles (Gee and Bauder, 1986). When the reaction with  $H_2O_2$  had ceased the samples were centrifuged  
156 for a minimum of 20 min at 4500 RPM, in which the supernatant was carefully removed using a pipette, and

157 subsequently the samples were washed in distilled water and centrifuged again to remove H<sub>2</sub>O<sub>2</sub> residues. After dry  
158 seiving, some of the samples from the Skagerrak and Ria Formosa areas had to be analysed with hydrometer for an  
159 accurate estimate of total grain size due to a high proportion of finer fractions (>15% was assessed as %<0.074 mm)  
160 in those sediments. The samples were once more treated with 0.05 M Na<sub>4</sub>P<sub>2</sub>O<sub>7</sub> and placed in a 1L cylinder containing  
161 distilled water and kept in suspension. At fixed time intervals (1, 2, 4, 10, 20, 50, 100, 200, 400 and 1000 min) the  
162 hydrometer was inserted and the concentration of sediment (g L<sup>-1</sup>) was noted. The mean grain size was presented in  
163 phi (φ) units.

164

## 165 2.4 Statistical analysis

166

167 To test for differences in sedimentary carbon storage (%C<sub>org</sub> and g C<sub>org</sub> cm<sup>-2</sup>) and grain size particles >0.074 mm among  
168 areas, between *Z. marina* and unvegetated areas (habitat) and among sediment depths, nested general linear mixed  
169 model ANOVAs were performed using site as random factor and with habitat nested in area and sediment depth nested  
170 in core. In those cases where the ANOVA models were significant, Tukey's HSD post hoc test was used to determine  
171 significant differences between specific areas and between habitats (*Z. marina* meadows vs. unvegetated areas). Prior  
172 to analysis all data were checked for normal distribution using the Shapiro-Wilk normality test and homogeneity of  
173 variances using Levene's test. When assumptions were not met the data was log<sub>10</sub>(x+1) transformed. Partial Least  
174 Square (PLS) regression technique (by modeling of projections of latent structures; Wold et al., 2001) and Principal  
175 Component Analysis (PCA) were conducted in SIMCA 13.0.3 (UMETRICS) to test the influence of sediment  
176 characteristics, water depth and seagrass-related variables on sediment carbon content (mean % C for the top 25 cm  
177 of sediment). The advantage of using PLS modeling is that it can handle collinear explanatory data as well as a large  
178 number of predictors. All cores were standardized to a depth of 25 cm for the sediment characteristics (porosity,  
179 density, grain size and organic carbon content) prior to the PLS- and PCA analyses. Some of the cores at Askö (both  
180 seagrass- and unvegetated sites) lacked the 12.5-25 cm depth segment and in these cases logarithmic regressions were  
181 used to extrapolate the data down to 25 cm depth (Torö [T] %C<sub>org</sub>;  $y = -0.87 \ln[x] + 0.3845$ , g C<sub>org</sub> cm<sup>-2</sup>;  $y = -$



182  $0.001\ln[x]+0.0052$ , Torö [Tr] [r], %C<sub>org</sub>;  $y=-0.032\ln[x]+0.2225$ , g C<sub>org</sub> cm<sup>-2</sup>;  $y=-0.0002\ln[x]+0.0053$ ). The carbon content  
183 in seagrass meadows decreases logarithmically with sediment depth in general (Fourqurean et al., 2012) due to  
184 degradation and remineralization of organic material with time (Burdige, 2007; Henrichs, 1992),  
185

## 186 3. Results

187

### 188 3.1 Variation in sedimentary carbon storage

189

190 The *Z. marina* meadows had significantly higher sedimentary carbon content (both in % C<sub>org</sub> and g C<sub>org</sub> cm<sup>-2</sup>) compared  
191 to the unvegetated areas ( $P < 0.001$ ; Table 2). Within the different areas only Gullmar Fjord and Ria Formosa showed  
192 significantly different values compared to their respective unvegetated areas ( $P < 0.001$ ) while Askö and Sozopol did  
193 not show any between-habitat differences (Fig. 2). In terms of % C<sub>org</sub> and g C<sub>org</sub> cm<sup>-2</sup>, Gullmar Fjord was significantly  
194 different from all other areas ( $P < 0.05$ ) whereas Ria Formosa were significantly different to Sozopol ( $P < 0.05$ ) but not  
195 to Askö, and no difference was seen between Sozopol and Askö (Table 2; Fig. 2). The highest amount of sedimentary  
196 carbon was seen in the Gullmar Fjord, followed by Ria Formosa, Askö and Sozopol (Table 4). There were no significant  
197 differences in either % C<sub>org</sub> or g C<sub>org</sub> cm<sup>-2</sup> among different sediment depths (Table 2; Fig. 3).

198

### 199 3.2 Influence of sediment characteristics and seagrass-associated variables on carbon storage

200

201 When the relationship between % C<sub>org</sub> and explanatory variables (Tables 2, 3 and 4) was examined in a PLS (Partial  
202 least square) regression model the sediment characteristics explained most of the model (with a variance of importance  
203 value >1) where the proportion of sediment particles <0.074 mm (%) was the most important, followed by sediment  
204 porosity (%), sediment density (g DW mL<sup>-1</sup>) and mean grain size ( $\phi$ ) (Fig. 4). These variables characterizing the  
205 sediment were all positively correlated to % C<sub>org</sub> except sediment density that showed a negative relationship with %  
206 C<sub>org</sub>. The cumulative fraction explaining the % C<sub>org</sub> variation ( $R_y^2$  cum) of the predictor variables combined was 0.81  
207 and the models cross-validated variance ( $Q^2$  statistics) showed high predictability with  $Q^2$ -value of 0.79, thus larger  
208 than the significant level of 0.05. The results of the model with g C<sub>org</sub> cm<sup>-2</sup> (not shown here) as response variable were  
209 highly similar to the results of % C<sub>org</sub> ( $Q^2 = 0.77$ ,  $R_y^2$  cum = 0.78) with the same predictor variables (i.e. sediment  
210 characteristics) explaining most of the % C<sub>org</sub> variation and correlated in the same way. All seagrass-associated

211 variables showed a positive relationship with % C<sub>org</sub> except for belowground (Bg) biomass N (%), which was the least  
212 influential variable in the model. In general, the seagrass-associated variables showed a lower contribution to the  
213 overall model compared to the sediment characteristics. Water depth (m) was also negatively correlated to % C<sub>org</sub> but  
214 was, as with the seagrass-associated variables, of minor importance (Fig. 4).

215  
216 The amount of sediment particles <0.0074 mm was significantly higher in *Z. marina* meadows compared to unvegetated  
217 areas ( $P < 0.001$ ; Table 2). This was true for all of four areas when comparing to respective unvegetated areas ( $P <$   
218  $0.05$ ). Sediment grain size particles < 0.074 mm were significantly different between areas ( $P < 0.001$ ; Table 2), where  
219 Gullmar Fjord and Ria Formosa showed significantly higher values compared to the other areas ( $P < 0.001$ ), while there  
220 were no significant differences between Askö and Sozopol (Table 4). There was no difference in grain size particles  
221 <0.074 in terms of sediment depth (Table 2). Mean grain size ( $\phi$ ) and sediment particles < 0.074 mm (%) both showed  
222 strong positive linear relationship with % C<sub>org</sub> in *Z. marina* meadows (mean phi ( $\phi$ ),  $R^2 = 0.74$ ,  $P < 0.001$ ; sediment  
223 particles < 0.074 mm (%),  $R^2 = 0.91$ ,  $P < 0.001$ ; Fig. 5a and b). For unvegetated areas, mean grain size ( $\phi$ ) did not show  
224 any relationship with % C<sub>org</sub> (linear regression,  $R^2 = 0.009$ ,  $P < 0.40$ ; Fig 5c) but was positively related to sediment  
225 particles <0.074 mm (%) (linear regression,  $R^2 = 0.42$ ,  $P < 0.001$ ; Fig. 5d). The sediment density (g DW mL<sup>-1</sup>) had a  
226 negative effect on % C<sub>org</sub> in the seagrass sites (linear regression,  $R^2 = 0.84$ ,  $P < 0.001$ ) and sediment porosity (%) was  
227 positively related to % C<sub>org</sub> (linear regression,  $R^2 = 0.80$ ,  $P < 0.001$ ; Fig. 6a and b). There was no significant relationship  
228 between % C<sub>org</sub> and sediment density (g DW mL<sup>-1</sup>) in unvegetated areas while sediment porosity (%) was significantly  
229 influencing % C<sub>org</sub> but showed a low R<sub>2</sub>-value (linear regression,  $R^2 = 0.08$ ,  $P < 0.001$ ; Fig. S2).

230  
231 The sedimentary organic carbon content relationship to the different predictor variables was not uniform among sites.  
232 In a PCA model, the Gullmar Fjord and Ria Formosa were grouped separately from other sites, while the Baltic- and  
233 Black Seas sites overlapped each other (Fig. 7). The PCA model explained a large part of the variation with eigenvalues  
234 of 0.44 for PC1 and 0.25 for PC2. For the fine grain size seagrass sites of the Gullmar Fjord (Table 4), the sediment  
235 characteristics (i.e. sediment particles <0.074 mm (%), sediment porosity (%) and mean grain size ( $\phi$ )) were important

236 for the carbon content while the sedimentary carbon in Ria Formosa was more related to seagrass cover (%) and dry  
237 weight belowground biomass ( $m^2$ ). The sedimentary organic carbon content in seagrass sites in Baltic- and Black Seas  
238 were also more related to the seagrass-associated variables, such as dry weight aboveground biomass ( $m^2$ ) and shoot  
239 density ( $m^2$ ), but also water depth (m) for one of the sites (Storsand, S).

240

241

#### 242 4. Discussion

243

244 In this assessment of four *Z. marina* areas in Europe, we found a large variation in organic carbon storage where the  
245 carbon-rich sediment of the Gullmar Fjord on the Swedish west coast was 15 times higher compared to levels in the  
246 Baltic- and Black Seas. Along with recent studies (Lavery et al., 2013; Samper-Villarreal et al., 2016), this study shows  
247 that the environmental conditions play an essential role in determining the carbon sink capacity. Here we demonstrate  
248 that sediment characteristics influence carbon storage in *Z. marina* meadows, where high sedimentary organic carbon  
249 corresponds with high content of fine grain size, high sediment porosity and low sediment density. Seagrass meadows  
250 situated in areas characterized by these sediment properties are therefore suggested to have a high potential as natural  
251 carbon sinks.

252

253 Overall *Z. marina* meadows showed higher carbon content than nearby unvegetated areas, with the exception of the  
254 seagrass meadows with the lowest carbon storage, which illustrates just as previous studies have shown (e.g. Kennedy  
255 et al. 2010; Mcleod et al. 2011), that the seagrass ecosystem is a significant carbon sink. The mean carbon content of  
256 the Gullmar Fjord was higher than estimated global averages (Fourqurean et al., 2012; Kennedy et al., 2010),  
257 demonstrating the high carbon capacity of the area. The comparison with other *Z. marina* meadows in Europe and USA  
258 also showed that the Swedish Skagerrak coast (e.g. the Gullmar Fjord) has an overall high carbon storage capacity  
259 (Table 5). The lowest carbon content were found in the Baltic- and Black Sea (no previous studies on sedimentary  
260 carbon content could be found for the Black Sea; Table 5). This could be related to less suitable physical conditions of  
261 the Brackish environment with lower salinity, which may negatively affect plant growth and meadow productivity (Salo  
262 et al., 2014), in combination with growing in more exposed areas with coarser (sandy) sediment, as seen in the *Z.*  
263 *marina* meadows at Askö, where the most sheltered bays with finer grain sizes are dominated by brackish water plants,  
264 such as *Potamogeton pectinatus* and *Zannichellia palustris* (Idestam-Almquist, 2000). Meadows situated in more  
265 exposed areas could result in a high export of the produced organic matter, as suggested by Röhr et al., (2016) instead  
266 of the carbon being accumulated in the sediment, leading to a low carbon storage potential of the area. This could also

267 be true for the meadows in Ria Formosa, the only area in this study with a pronounced tide, where the higher  
268 hydrodynamic forces could also lead to increased sediment erosion. Although the meadows at Sozopol and Askö were  
269 dominated by *Z. marina* also smaller seagrass species (i.e. *Zostera noltii* and *Ruppia maritima*) were found in the  
270 meadows; smaller species with lower canopy and belowground biomass could also be part of the explanation to lower  
271 sedimentary carbon concentrations as trapping of suspended particles (Fonseca and Cahalan, 1992) and the  
272 belowground biomass production contribute to the accumulation of carbon (Duarte et al., 1998). The trapping of fine-  
273 grained particles and prevention of sediment particle resuspension (by reducing the water velocity) in the canopy are  
274 also likely the reason why the *Z. marina* meadows had substantially higher amount of smaller grain size particles  
275 compared to the unvegetated areas. Due to the fact that core shortening was not corrected for in our sediment samples  
276 there might be a margin of error up to 8% in our data. The influence of compression is most likely highest in the  
277 Skagerrak area, where the sediment is soft and has a high porosity (Glew et al., 2001), but given the large variation in  
278 carbon storage a reduction of 8% in sedimentary carbon content will not undermine our general conclusion.

279  
280 A high carbon content in *Zostera marina* sediment seems to be related to the sediment characteristics of the area. A  
281 high proportion of finer grain size particles leads to preservation and accumulation of organic matter (Keil et al., 1994;  
282 Mayer, 1994a, 1994b) due to a higher surface area on fine-grained particles, leading to an aggregation of organic matter  
283 (Bergamaschi et al., 1997). Finer grain sizes in combination with high organic matter and nutrient content, as seen in  
284 the Gullmar Fjord sites, could cause a depletion of oxygen in the sediment because of increased oxygen consumption  
285 by detritivore organisms (detritivores) and decreased permeability (Pollard and Moriarty, 1991; Wilson et al., 2008),  
286 which slows down the degradation process of organic matter (Hedges and Keil, 1995). Sediment grain size has recently  
287 been described as a strong predictor for carbon storage in another blue carbon habitat, i.e. saltmarshes (Kelleway et  
288 al., 2016), and for seagrass meadows, the finer grain sized particles has shown to influence sedimentary carbon content  
289 in some seagrass habitats (Röhr et al., 2016), while in others it seems less important (Samper-Villarreal et al. 2016).  
290 The relations between carbon storage and various sediment characteristics are more pronounced in meadows with  
291 low seagrass biomass and high proportion of finer particle sizes, while in meadows with larger seagrass species, i.e.

292 *Posidonia* spp. and *Amphibolis* spp., having high amount of autochthonously derived sedimentary carbon, the mud and  
293 silt content was shown to have little influence (Serrano et al., 2016). Compared to *Posidonia* spp. and *Amphibolis* spp.  
294 the smaller sized *Z. marina* plants will potentially contribute less to the sediment organic matter pool, which might be  
295 the reason to why the proportion of fine sediment particles was strongly coupled to a high carbon content in the present  
296 study. Other factors have previously shown to be of importance, such as water depth, meadow productivity,  
297 sedimentation rate, trapping of fine-grained sediment and organic matter (Serrano et al., 2015), and while these factors  
298 were not seen or accounted for in this study they may also be relevant when determining areas of high carbon storage  
299 potential. The grain size is directly linked to the sediment porosity and density where the organic carbon has a negative  
300 effect on sediment density (Avnimelech et al., 2001; Gullström et al., submitted). This was also seen in our study as  
301 higher sedimentary carbon values were found in areas with lower sediment density (and hence higher porosity). For  
302 these reasons, we suggest that sediment characteristics of the area where *Z. marina* meadows are situated is relevant  
303 for revealing the carbon storage potential.

304

305 A high organic content in the sediment could, however, cause a depletion of oxygen (Holmer, 1999) and at too low  
306 oxygen levels seagrass can no longer maintain the aerobic conditions of the rhizosphere, eventually leading to seagrass  
307 mortality (Terrados et al., 1999) with consequences for the carbon storage capacity. The seagrasses could adapt to  
308 lower oxygen concentrations by reducing the shoot density (Folmer et al., 2012) and thereby lower the oxygen demand  
309 of the root-rhizome system, which may explain why the areas with high proportion of fine grain size particles in this  
310 study had the lowest shoot density. High canopy height, high shoot density and shallow depths are generally considered  
311 to increase sedimentation rates and thus promote accumulation of finer grain size particles (Bos et al., 2007; Fonseca  
312 and Cahalan, 1992; Peralta et al., 2008). This implies that aboveground seagrass structure and water depth should  
313 influence the sediment carbon storage, however, in our study these variables were of minor influence. The influence of  
314 seagrass meadow structure on sediment composition is complex and hard to predict, and may be highly influenced by  
315 environmental conditions (van Katwijk et al., 2010). The carbon storage in *Z. marina* meadows in our study was clearly  
316 related to sediments with high proportion of fine grain size particles, high porosity and low density. In areas with less

317 **fine-sized sediment particles** other variables, such as above- and below-ground seagrass biomass, seagrass cover and  
318 shoot density, have a more pronounced influence on carbon storage levels. For example, the influence of belowground  
319 biomass and seagrass cover on sedimentary carbon content in Ria Formosa could be due to the stabilizing properties  
320 of dense meadows (Suykerbuyk et al., 2015), the binding of sediment by the root-rhizome system (Christianen et al.,  
321 2013) and the high lignin content of the belowground biomass (Klap et al., 2000), **which results in more decay-resistant**  
322 **carbon and a slower decomposition** (Cowie and Hedges, 1984; Ertel and Hedges, 1985). Seagrass biomass and cover  
323 **are generally highly dynamic and act on a shorter time-scale than the sedimentary carbon storage processes, therefore**  
324 **estimates of present seagrass meadow properties may not be fully representative over decades or centuries, which is**  
325 **the likely time-scale for carbon storage in the sediment. The age of the sediment and the rate of accumulation of organic**  
326 **matter are factors that vary between sites where a higher sedimentation rate increases the amount of organic carbon**  
327 **and could be a potential explanation to variation in carbon storage among seagrass meadows** (Serrano et al, 2015).

328

329 The continuous loss of seagrass areas (Waycott et al., 2009) leads to a decline in natural carbon sinks (Dahl et al., 2016;  
330 Marbà et al., 2015), and to ensure efficient management, factors for high carbon storage capacity should be evaluated.  
331 Several environmental and seagrass-related factors have shown to be of importance, i.e. water depth (Serrano et al.,  
332 2014), meadow size (Ricart et al., 2015), hydrodynamics and seagrass canopy complexity (Samper-Villarreal et al.,  
333 2016). In our study, the main factors related to high carbon storage were the sediment density and porosity, and  
334 amount of fine grain size particles in the sediment, whereas the seagrass-associated variables had a minor influence.  
335 Therefore, we highlight that the sediment characteristics is an important factor for a high carbon storage potential in  
336 these types of *Z. marina* meadows, and should be taking into consideration **(together with other relevant factors)** when  
337 evaluating high priority areas for protection of efficient carbon storage *Z. marina* areas.

338

339 **Data availability**

340



341 All data is presented in the manuscript and supplementary figures. Figure S1, shows the variance of importance (VIP)  
342 for the response variables in the PLS model (see Fig. 4). Figure S2, semi-log plots showing the relationship between  
343 sediment porosity and density, and sedimentary organic carbon for unvegetated areas.

344

#### 345 **Author contribution**

346

347 The design of this study was carried out by Martin Dahl, Martin Gullström, Mats Björk and Diana Deyanova. The  
348 collection of data was done by Martin Dahl, Diana Deyanova, Liberatus D. Lyimo, Martin Gullström, Maria E. Asplund  
349 and Ventzislav Karamfilov, and was analyzed by Martin Dahl, Martin Gullström, Mats Björk, Silvia Gütschow and Maria  
350 E. Asplund. Martin Dahl prepared the manuscript with contribution from Martin Gullström, Mats Björk, Maria E.  
351 Asplund, Diana Deyanova, Ventzislav Karamfilov, Silvia Gütschow and Rui Santos.

352

#### 353 **Acknowledgement**

354

355 We thank Bruno Dias Duarte Fragoso, Dimitar Berov, Atanas Tanev, Diana Perry, Tom Staveley and Kuzman Dimov for  
356 their assistance in the field, and Stefania Klayn and Yoana Georgieva for helping out with preparing the sediment prior  
357 to analysis. We are also grateful to Alan Koliji for his contribution on the grain size analysis. This study was partly  
358 funded by the Swedish International Development Cooperation Agency (Sida) through the Bilateral Marine Science  
359 Program between Sweden and Tanzania.

360

361

362 **References**

- 363 Avnimelech, Y., Ritvo, G., Meijer, L. E. and Kochba, M.: Water content, organic carbon and dry bulk density in flooded  
364 sediments, *Aquac. Eng.*, 25(1), 25–33, doi:10.1016/S0144-8609(01)00068-1, 2001.
- 365 Baden, S. P. and Boström, C.: The leaf canopy of seagrass beds: faunal community structure and function in a salinity  
366 gradient along the Swedish coast, in *Ecological Studies*, vol. 151, edited by K. Reise, pp. 213–236, Springer Berlin /  
367 Heidelberg, 2001.
- 368 Benner, R., Maccubbin, A. E. and Hodson, R. E.: Anaerobic biodegradation of the lignin and polysaccharide components  
369 of lignocellulose and synthetic lignin by sediment microflora, *Appl. Environ. Microbiol.*, 47(5), 998–1004, 1984.
- 370 Bergamaschi, B. a., Tsamakis, E., Keil, R. G., Eglinton, T. I., Montluçon, D. B. and Hedges, J. I.: The effect of grain size and  
371 surface area on organic matter, lignin and carbohydrate concentration, and molecular compositions in Peru Margin  
372 sediments, *Geochim. Cosmochim. Acta*, 61(6), 1247–1260, doi:10.1016/S0016-7037(96)00394-8, 1997.
- 373 Bos, A. R., Bouma, T. J., de Kort, G. L. J. and van Katwijk, M. M.: Ecosystem engineering by annual intertidal seagrass beds:  
374 sediment accretion and modification, *Estuar. Coast. Shelf Sci.*, 74(1-2), 344–348, doi:10.1016/j.ecss.2007.04.006, 2007.
- 375 **Boschker, H., Wielemaker, A., Schaub, B. and Holmer, M.: Limited coupling of macrophyte production and bacterial  
376 carbon cycling in the sediments of *Zostera* spp. meadows, *Mar. Ecol. Prog. Ser.*, 203, 181–189,  
377 doi:10.3354/meps203181, 2000.**
- 378 Boström, C., Baden, S. and Krause-Jensen, D.: The seagrasses of Scandinavia and the Baltic sea, in *World atlas of  
379 seagrasses: present status and future conservation*, edited by E. . Green and F. T. Short, pp. 27–37, California Press,  
380 California, 2003.
- 381 **Boström, C., O'Brien, K., Roos, C. and Ekebom, J.: Environmental variables explaining structural and functional diversity  
382 of seagrass macrofauna in an archipelago landscape, *J. Exp. Mar. Bio. Ecol.*, 335, 52–73,  
383 doi:10.1016/j.jembe.2006.02.015, 2006.**
- 384 Burdige, D. J.: Preservation of organic matter in marine sediments: Controls, mechanisms, and an imbalance in sediment  
385 organic carbon budgets?, *Chem. Rev.*, 107(2), 467–485, doi:10.1021/cr050347q, 2007.
- 386 Christianen, M. J. A., van Belzen, J., Herman, P. M. J., van Katwijk, M. M., Lamers, L. P. M., van Leent, P. J. M. and Bouma, T.  
387 J.: Low-canopy seagrass beds still provide important coastal protection services, *PLoS One*, 8(5),  
388 doi:10.1371/journal.pone.0062413, 2013.
- 389 Cowie, G. L. and Hedges, J. I.: Carbohydrates sources in a coastal marine environment, *Geochim. Cosmochim. Acta*, 48,  
390 2075–2087, 1984.
- 391 Cunha, A. H., Assis, J. F. and Serrão, E. A.: Seagrasses in Portugal: a most endangered marine habitat, *Aquat. Bot.*, 104,  
392 193–203, doi:10.1016/j.aquabot.2011.08.007, 2013.

- 393 Dahl, M., Deyanova, D., Lyimo, L. D., Näslund, J., Samuelsson, G. S., Mtolera, M. S. P., Björk, M. and Gullström, M.: Effects  
394 of shading and simulated grazing on carbon sequestration in a tropical seagrass meadow, *J. Ecol.*, n/a-n/a,  
395 doi:10.1111/1365-2745.12564, 2016.
- 396 Dale, N. G.: *Bacteria in intertidal sediment: Factors related to their distribution*, *Limnol. Oceanogr.*, 19(3), 509–519,  
397 1974.
- 398 Deming, J. W. and Harass, J. A.: The early diagenesis of organic matter: bacterial activity, in *Organic Geochemistry:*  
399 *principles and application*, edited by M. H. Engel and S. A. Macko., 1993.
- 400 Duarte, C. M., Merino, M., Agawin, N. S. R., Uri, J., Fortes, M. D., Gallegos, M. E., Marbà, N. and Hemminga, M. A.: Root  
401 production and belowground seagrass biomass, *Mar. Ecol. Prog. Ser.*, 171, 97–108, 1998.
- 402 Duarte, C. M., Kennedy, H., Marbà, N. and Hendriks, I.: Assessing the capacity of seagrass meadows for carbon burial:  
403 current limitations and future strategies, *Ocean Coast. Manag.*, 83, 32–38, doi:10.1016/j.ocecoaman.2011.09.001, 2011.
- 404 Enriquez, S., Duarte, C. M. and Sand-Jensen, K.: Patterns in decomposition rates among photosynthetic organisms: the  
405 importance of detritus C:N:P content, *Oecologia*, 94, 457–471, 1993.
- 406 Ertel, J. R. and Hedges, J. I.: Sources of sedimentary humic substances: vascular plant debris, *Geochim. Cosmochim. Acta*,  
407 49(10), 2097–2107, doi:10.1016/0016-7037(85)90067-5, 1985.
- 408 Folmer, E. O., Geest, M., Jansen, E., Olf, H., Michael Anderson, T., Piersma, T. and Gils, J. a.: Seagrass–sediment feedback:  
409 an exploration using a non-recursive structural equation model, *Ecosystems*, 15(8), 1380–1393, doi:10.1007/s10021-  
410 012-9591-6, 2012.
- 411 Fonseca, M. S., Thayer, G. W., Chester, A. J. and Foltz, C.: *Impact of Scallop Harvesting on Eelgrass (*Zostera marina*)*  
412 *Meadows : Implications for Management*, *North Am. J. Fish.*, 4, 37–41, doi:10.1577/1548-8659(1984)4, 1984.
- 413 Fonseca, M. S. and Cahalan, J. A.: A preliminary evaluation of wave attenuation by four species of seagrass, *Estuar. Coast.*  
414 *Shelf Sci.*, 35, 565–576, 1992.
- 415 Fourqurean, J. W., Duarte, C. M., Kennedy, H., Marbà, N., Holmer, M., Mateo, M. A., Apostolaki, E. T., Kendrick, G. a., Krause-  
416 Jensen, D., McGlathery, K. J. and Serrano, O.: Seagrass ecosystems as a globally significant carbon stock, *Nat. Geosci.*,  
417 5(7), 505–509, doi:10.1038/ngeo1477, 2012.
- 418 Fredriksen, S., De Backer, A., Boström, C. and Christie, H.: *Infauna from *Zostera marina* L. meadows in Norway.*  
419 *Differences in vegetated and unvegetated areas*, *Mar. Biol. Res.*, 6(February 2015), 189–200,  
420 doi:10.1080/17451000903042461, 2010.
- 421 Gee, G. W. and Bauder, J. W.: Particle size analysis, in *Methods of Soil Analysis: Part 1—Physical and Mineralogical*  
422 *Methods*, edited by A. Klute, pp. 383–409, American Society of Agronomy, Madison., 1986.
- 423 Green, E. P. and Short, F. T.: *World atlas of seagrasses: present status and future conservation*, University of California  
424 Press, Berkley USA., 2003.

- 425 Gullström, M., Baden, S. and Lindegarth, M.: Spatial patterns and environmental correlates in leaf-associated epifaunal  
426 assemblages of temperate seagrass (*Zostera marina*) meadows, *Mar. Biol.*, 159, 413–425, doi:10.1007/s00227-011-  
427 1819-z, 2012.
- 428 Gullström, M., Lyimo, L. D., Dahl, M., Samuelsson, G. S., Eggertsen, M., Anderberg, E., Rasmusson, L. M., Linderholm, L.  
429 W., Knudby, A., Bandeira, S., Mtwana Nordlund, L., Björk, M.: Blue carbon storage in tropical seagrass meadows  
430 influenced by plant structure, sediment composition and landscape configuration. Submitted manuscript.
- 431 Harris, D., Horwath, W. R. and van Kessel, C.: Acid fumigation of soils to remove carbonates prior to total organic carbon  
432 or CARBON-13 isotopic analysis, *Soil Sci. Soc. Am. J.*, 65(July 2000), 1853–1856, doi:10.2136/sssaj2001.1853, 2001.
- 433 Hedges, J. I. and Keil, R. G.: Sedimentary organic matter preservation: an assessment and speculative synthesis, *Mar.*  
434 *Chem.*, 49(2-3), 81–115, doi:10.1016/0304-4203(95)00008-F, 1995.
- 435 Hendriks, I. E., Sintès, T., Bouma, T. J. and Duarte, C. M.: Experimental assessment and modeling evaluation of the effects  
436 of the seagrass *Posidonia oceanica* on flow and particle trapping, *Mar. Ecol. Prog. Ser.*, 356, 163–173,  
437 doi:10.3354/meps07316, 2008.
- 438 Henrichs, S. M.: Early diagenesis of organic matter in marine sediments: progress and perplexity, in *Marine Chemistry*,  
439 vol. 39, pp. 119–149., 1992.
- 440 Holmer, M.: The effect of oxygen depletion on anaerobic organic matter degradation in marine sediments, *Estuar. Coast.*  
441 *Shelf Sci.*, 48(3), 383–390, doi:10.1006/ecss.1998.0424, 1999.
- 442 Holmer, M. and Laursen, L.: Effect of shading of *Zostera marina* (eelgrass) on sulfur cycling in sediments with  
443 contrasting organic matter and sulfide pools, *J. Exp. Mar. Bio. Ecol.*, 270, 25–37, doi:10.1016/S0022-0981(02)00015-1,  
444 2002.
- 445 Holmer, M., Carta, C. and Andersen, F.: Biogeochemical implications for phosphorus cycling in sandy and muddy  
446 rhizosphere sediments of *Zostera marina* meadows (Denmark), *Mar. Ecol. Prog. Ser.*, 320, 141–151,  
447 doi:10.3354/meps320141, 2006.
- 448 Idestam-Almqvist, J.: Dynamics of submersed aquatic vegetation on shallow soft bottoms in the Baltic Sea, *J. Veg. Sci.*,  
449 11(3), 425–432, doi:10.2307/3236635, 2000.
- 450 Jephson, T., Nyström, P., Moksnes, P. O. and Baden, S. P.: Trophic interactions in *Zostera marina* beds along the Swedish  
451 coast, *Mar. Ecol. Prog. Ser.*, 369, 63–76, doi:10.3354/meps07646, 2008.
- 452 Jerling, L., Lindhe, A.: Mjukbottenvegetation vid Trosa skärgård, Three-year project (MSc thesis), Dept of Botany,  
453 Stockholm University, 1976.
- 454 van Katwijk, M. M., Bos, A. R., Hermus, D. C. R. and Suykerbuyk, W.: Sediment modification by seagrass beds:  
455 muddification and sandification induced by plant cover and environmental conditions, *Estuar. Coast. Shelf Sci.*, 89, 175–  
456 181, doi:10.1016/j.ecss.2010.06.008, 2010.

- 457 Keil, R., Montluçon, D., Prahl, F. and Hedges, J.: Sorptive preservation of labile organic matter in marine sediments,  
458 Nature, 370(JANUARY 1994), 549–552, doi:10.1038/370549a0, 1994.
- 459 Kelleway, J. J., Saintilan, N., Macreadie, P. I. and Ralph, P. J.: Sedimentary factors are key predictors of carbon storage in  
460 SE Australian saltmarshes, Ecosystems, (C), doi:10.1007/s10021-016-9972-3, 2016.
- 461 Kennedy, H., Beggins, J., Duarte, C. M., Fourqurean, J. W., Holmer, M., Marbà, N. and Middelburg, J. J.: Seagrass sediments  
462 as a global carbon sink: isotopic constraints, Global Biogeochem. Cycles, 24(4), GB4026, doi:10.1029/2010GB003848,  
463 2010.
- 464 Kenworthy, W. J. and Thayer, G. W.: Production and decomposition of the roots and rhizomes of seagrasses, *Zostera*  
465 *marina* and *Thalassia testudinum*, in temperate and subtropical marine ecosystems, Bull. Mar. Sci., 35(3), 364–379,  
466 1984.
- 467 Kenworthy, W. J., Gallegos, C. L., Costello, C., Field, D. and di Carlo, G.: Dependence of eelgrass (*Zostera marina*) light  
468 requirements on sediment organic matter in Massachusetts coastal bays: Implications for remediation and restoration,  
469 Mar. Pollut. Bull., 83(2), 446–457, doi:10.1016/j.marpolbul.2013.11.006, 2014.
- 470 Klap, V. A., Hemminga, M. A. and Boon, J. J.: Retention of lignin in seagrasses: angiosperms that returned to the sea, Mar.  
471 Ecol. Prog. Ser., 194, 1–11, 2000.
- 472 Lavery, P. S., Mateo, M.-Á., Serrano, O. and Rozaimi, M.: Variability in the carbon storage of seagrass habitats and its  
473 implications for global estimates of blue carbon ecosystem service., PLoS One, 8(9), e73748,  
474 doi:10.1371/journal.pone.0073748, 2013.
- 475 Marbà, N., Arias-Ortiz, A., Masqué, P., Kendrick, G. A., Mazarrasa, I., Bastyan, G. R., Garcia-Orellana, J. and Duarte, C. M.:  
476 Impact of seagrass loss and subsequent revegetation on carbon sequestration and stocks, J. Ecol., 103, 296–302,  
477 doi:10.1111/1365-2745.12370, 2015.
- 478 Mayer, L. M.: Relationships between mineral surfaces and organic carbon concentrations in soils and sediments, Chem.  
479 Geol., 114, 347–363, doi:10.1016/0009-2541(94)90063-9, 1994a.
- 480 Mayer, L. M.: Surface area control of organic carbon accumulation in continental shelf sediments, Geochim. Cosmochim.  
481 Acta, 58(4), 1271–1284, doi:10.1016/0016-7037(94)90381-6, 1994b.
- 482 Mcleod, E., Chmura, G. L., Bouillon, S., Salm, R., Björk, M., Duarte, C. M., Lovelock, C. E., Schlesinger, W. H. and Silliman, B.  
483 R.: A blueprint for blue carbon: toward an improved understanding of the role of vegetated coastal habitats in  
484 sequestering CO<sub>2</sub>, Front. Ecol. Environ., 9(10), 552–560, doi:10.1890/110004, 2011.
- 485 Moore, K. A. and Short, F. T.: *Zostera*: biology, ecology, and management, in Seagrasses: Biology, Ecology and  
486 Conservation, edited by A. W. D. Larkum, R. J. W. Orth, and C. M. Duarte, pp. 361–386, Springer, Dordrecht., 2003.
- 487 Olesen, B. and Sand-Jensen, K.: Biomass-density patterns in the temperate seagrass *Zostera marina*, Mar. Ecol. Prog.  
488 Ser., 109, 283–292, doi:10.3354/meps111283, 1994.

- 489 Peralta, G., Van Duren, L. A., Morris, E. P. and Bouma, T. J.: Consequences of shoot density and stiffness for ecosystem  
490 engineering by benthic macrophytes in flow dominated areas: a hydrodynamic flume study, *Mar. Ecol. Prog. Ser.*, 368,  
491 103–115, doi:10.3354/meps07574, 2008.
- 492 Phillips, R. C. and Meñez, E. G.: *Seagrasses*, Smithsonian Contributions To the Marina Sciences, nr 34, Washington DC,  
493 USA., 1988.
- 494 Pollard, P. C. and Moriarty, D. J. W.: Organic carbon decomposition, primary and bacterial productivity, and sulphate  
495 reduction, in tropical seagrass beds of the Gulf of Carpentaria, Australia, *Mar. Ecol. Prog. Ser.*, 69(1-2), 149–159,  
496 doi:10.3354/meps069149, 1991.
- 497 Ricart, A. M., York, P. H., Rasheed, M. A., Pérez, M., Romero, J., Bryant, C. V. and Macreadie, P. I.: Variability of sedimentary  
498 organic carbon in patchy seagrass landscapes, *Mar. Pollut. Bull.*, 100(1), 476–482,  
499 doi:10.1016/j.marpolbul.2015.09.032, 2015.
- 500 Rozaimi, M., Serrano, O. and Lavery, P. S.: Comparison of carbon stores by two morphologically different seagrasses, *J.*  
501 *R. Soc. West. Aust.*, 96(October), 81–83, 2013.
- 502 Rueda, J. L. and Salas, C.: Molluscs associated with a subtidal *Zostera marina* L. bed in southern Spain: Linking seasonal  
503 changes of fauna and environmental variables, *Estuar. Coast. Shelf Sci.*, 79(1), 157–167,  
504 doi:10.1016/j.ecss.2008.03.018, 2008.
- 505 Salo, T., Pedersen, M. F. and Boström, C.: Population specific salinity tolerance in eelgrass (*Zostera marina*), *J. Exp. Mar.*  
506 *Bio. Ecol.*, 461, 425–429, doi:10.1016/j.jembe.2014.09.010, 2014.
- 507 Samper-Villarreal, J., Lovelock, C. E., Saunders, M. I., Roelfsema, C. and Mumby, P. J.: Organic carbon in seagrass  
508 sediments is influenced by seagrass canopy complexity, turbidity, wave height, and water depth, *Limnol. Oceanogr.*,  
509 n/a–n/a, doi:10.1002/lno.10262, 2016.
- 510 Serrano, O., Mateo, M. A., Renom, P. and Julià, R.: Characterization of soils beneath a *Posidonia oceanica* meadow,  
511 *Geoderma*, 185–186, 26–36.
- 512 Serrano, O., Lavery, P. S., Rozaimi, M. and Mateo, M. Á.: Influence of water depth on the carbon sequestration capacity  
513 of seagrasses, *Global Biogeochem. Cycles*, 28, 950–961, doi:10.1002/2014GB004872. Received, 2014.
- 514 Serrano, O., Ricart, A. M., Lavery, P. S., Mateo, M. A., Arias-Ortiz, A., Masque, P., Steven, A., and Duarte, C. M.; Key  
515 biogeochemical factors affecting soil carbon storage in *Posidonia* meadows. *Biogeosciences Discuss.*, 12, 18913–18944,  
516 2015.
- 517 Serrano, O., Lavery, P. S., Duarte, C. M., Kendrick, G. A., Calafat, A., York, P., Steven, A. and Macreadie, P.: Can mud (silt  
518 and clay) concentration be used to predict soil organic carbon content within seagrass ecosystems?, *Biogeosciences*  
519 *Discuss.*, (January), 1–24, doi:10.5194/bg-2015-598, 2016.
- 520 Short, F. T., Carruthers, T., Dennison, W. and Waycott, M.: Global seagrass distribution and diversity: A bioregional  
521 model, *J. Exp. Mar. Bio. Ecol.*, 350(1-2), 3–20, doi:10.1016/j.jembe.2007.06.012, 2007.

- 522 Suykerbuyk, W., Bouma, T. J., Govers, L. L., Giesen, K., de Jong, D. J., Herman, P., Hendriks, J. and van Katwijk, M. M.:  
523 Surviving in changing seascapes: sediment dynamics as bottleneck for long-term seagrass presence, *Ecosystems*,  
524 doi:10.1007/s10021-015-9932-3, 2015.
- 525 Terrados, J., Duarte, C. M., Kamp-Nielsen, L., Agawin, N. S. R., Gacia, E., Lacap, D., Fortes, M. D., Borum, J., Lubanski, M.  
526 and Greve, T.: Are seagrass growth and survival constrained by the reducing conditions of the sediment?, *Aquat. Bot.*,  
527 65(1-4), 175–197, doi:10.1016/S0304-3770(99)00039-X, 1999.
- 528 Waycott, M., Duarte, C. M., Carruthers, T. J. B., Orth, R. J., Dennison, W. C., Olyarnik, S., Calladine, A., Fourqurean, J. W.,  
529 Heck, K. L., Hughes, A. R., Kendrick, G. A., Kenworthy, W. J., Short, F. T. and Williams, S. L.: Accelerating loss of seagrasses  
530 across the globe threatens coastal ecosystems., *Proc. Natl. Acad. Sci. U. S. A.*, 106(30), 12377–12381,  
531 doi:10.1073/pnas.0905620106, 2009.
- 532 Wilson, A. M., Huettel, M. and Klein, S.: Grain size and depositional environment as predictors of permeability in coastal  
533 marine sands, *Estuar. Coast. Shelf Sci.*, 80(1), 193–199, doi:10.1016/j.ecss.2008.06.011, 2008.
- 534 Wold, S., Sjöström, M. and Eriksson, L.: PLS-regression: A basic tool of chemometrics, *Chemom. Intell. Lab. Syst.*, 58(2),  
535 109–130, doi:10.1016/S0169-7439(01)00155-1, 2001.

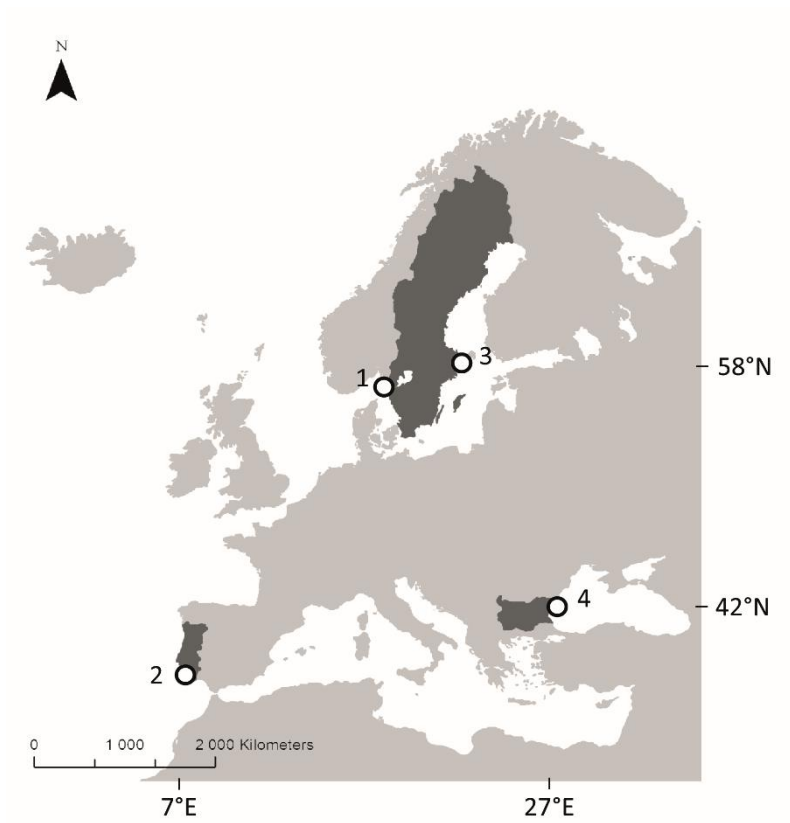

536

537 Figure 1. The four study regions, Gullmar Fjord (Skagerrak, Sweden) (1), Ria Formosa (gulf of Cádiz, Portugal) (2), Askö  
538 (Baltic Sea, Sweden) (3) and Sozopol (Black Sea, Bulgaria) (4).

539



540 Table 1. Description of study sites in the four areas of Europe.

| Area                                               | Site                     | Vegetation                           | Coordinates          | Mean depth (m) |
|----------------------------------------------------|--------------------------|--------------------------------------|----------------------|----------------|
| Gullmar Fjord (Skagerrak, Sweden)                  |                          |                                      |                      |                |
|                                                    | Finnsbo (F)              | <i>Z. marina</i>                     | 58°17'55N, 11°29'34E | 2.8            |
|                                                    | Kristineberg (K)         | <i>Z. marina</i>                     | 58°14'53N, 11°26'51E | 3.0            |
|                                                    | Rödberget (Rö) (r)       | Unvegetated                          | 58°15'06N, 11°27'54E | 2.5            |
| Ria Formosa (gulf of Cádiz, Portugal) <sup>1</sup> |                          |                                      |                      |                |
|                                                    | Culatra channel (C)      | <i>Z. marina</i> / <i>C. nodosa</i>  | 37°00'14N 7°49'36W   | 1.9            |
|                                                    | Ilha da Culatra (I)      | <i>Z. marina</i>                     | 36°59'50N, 7°49'41W  | 1.0            |
|                                                    | Culatra channel (Cr) (r) | Unvegetated                          | 37°00'15N, 7°49'33W  | 2.6            |
|                                                    | Ilha da Culatra (Ir) (r) | Unvegetated                          | 36°59'51N, 7°49'40W  | 1.8            |
| Askö (Baltic Sea, Sweden)                          |                          |                                      |                      |                |
|                                                    | Torö (T)                 | <i>Z. marina</i> / <i>R. maitima</i> | 58°48'14N, 17°47'32E | 3.2            |
|                                                    | Långskär (L)             | <i>Z. marina</i> / <i>R. maitima</i> | 58°48'00N, 17°40'48E | 2.2            |
|                                                    | Storsand (S)             | <i>Z. marina</i>                     | 58°48'26N, 17°41'40E | 3.8            |
|                                                    | Torö (Tr) (r)            | Unvegetated                          | 58°48'21N, 17°47'31E | 6              |
|                                                    | Godahoppsudden (Gh) (r)  | Unvegetated                          | 58°48'09N, 17°42'24E | 2.9            |
| Sozopol (Black Sea, Bulgaria)                      |                          |                                      |                      |                |
|                                                    | Ropotamo (Rt)            | <i>Z. marina</i> / <i>Z. noltii</i>  | 42°19'49N, 27°45'20E | 2.7            |
|                                                    | Gradina (G)              | <i>Z. marina</i> / <i>Z. noltii</i>  | 42°25'39N, 27°39'05E | 4.2            |
|                                                    | Bay of Sozopol (r)       | Unvegetated                          | 42°24'42N, 27°39'48E | 5.7            |

541 r = reference site (unvegetated area)

542 <sup>1</sup>Depth values standardized to mean low water (MLW).

543

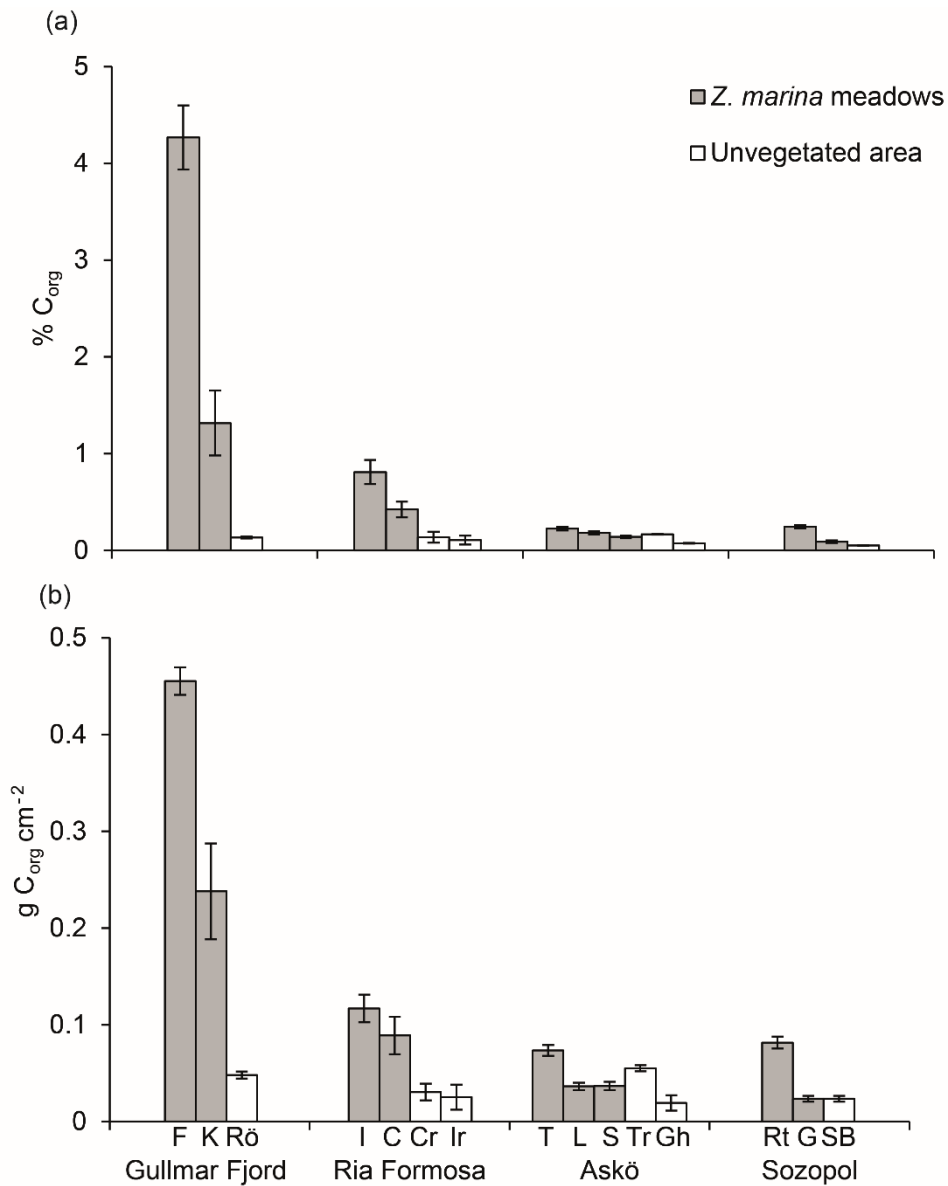

544  
545  
546  
547  
548  
549

Figure 2. Mean ( $\pm$ SE)  $\% C_{org}$  (a) and  $g C_{org} cm^{-2}$  (b) in sediment (for 0-25 cm sediment depth). The percent organic carbon ( $\% C_{org}$ ) is presented as a mean of the content of the top 25 cm sediment, while carbon per unit area ( $g C_{org} cm^{-2}$ ) is the total (accumulated) amount of carbon in the top 25 cm of sediment. For full names of the sites see Table 1.

550 Table 2. Summary of nested general linear mixed model ANOVAs for sediment carbon content and sediment grain size  
 551 (% C<sub>org</sub>, g C<sub>org</sub> cm<sup>-2</sup> and sediment grain size particles <0.074 mm). The factor Habitat is comparing *Z. marina* meadows and  
 552 unvegetated areas. Bold values indicates significant values (P<0.05).

| Source of variation   | df  | % C <sub>org</sub> |          |                  | g C <sub>org</sub> cm <sup>-2</sup> |          |                  | Grain Size (<0.074 mm) |          |                  |
|-----------------------|-----|--------------------|----------|------------------|-------------------------------------|----------|------------------|------------------------|----------|------------------|
|                       |     | MS                 | <i>F</i> | p                | MS                                  | <i>F</i> | p                | MS                     | <i>F</i> | p                |
| Area                  | 3   | 1.0734             | 81.00    | <b>&lt;0.001</b> | 0.000                               | 98.36    | <b>&lt;0.001</b> | 4.6387                 | 78.32    | <b>&lt;0.001</b> |
| Habitat (Area)        | 4   | 1.1603             | 87.55    | <b>&lt;0.001</b> | 0.000                               | 112.23   | <b>&lt;0.001</b> | 4.7868                 | 80.82    | <b>&lt;0.001</b> |
| Core                  | 5   | 0.0188             | 1.42     | 0.218            | 0.000                               | 2.30     | <b>0.045</b>     | 0.0415                 | 0.70     | 0.498            |
| Sediment depth (Core) | 24  | 0.0107             | 0.81     | 0.724            | 0.000                               | 1.51     | 0.059            | 0.0677                 | 1.14     | 0.328            |
| Residual              | 378 | 0.0133             |          |                  | 0.000                               |          |                  | 0.0592                 |          |                  |

553

554

555

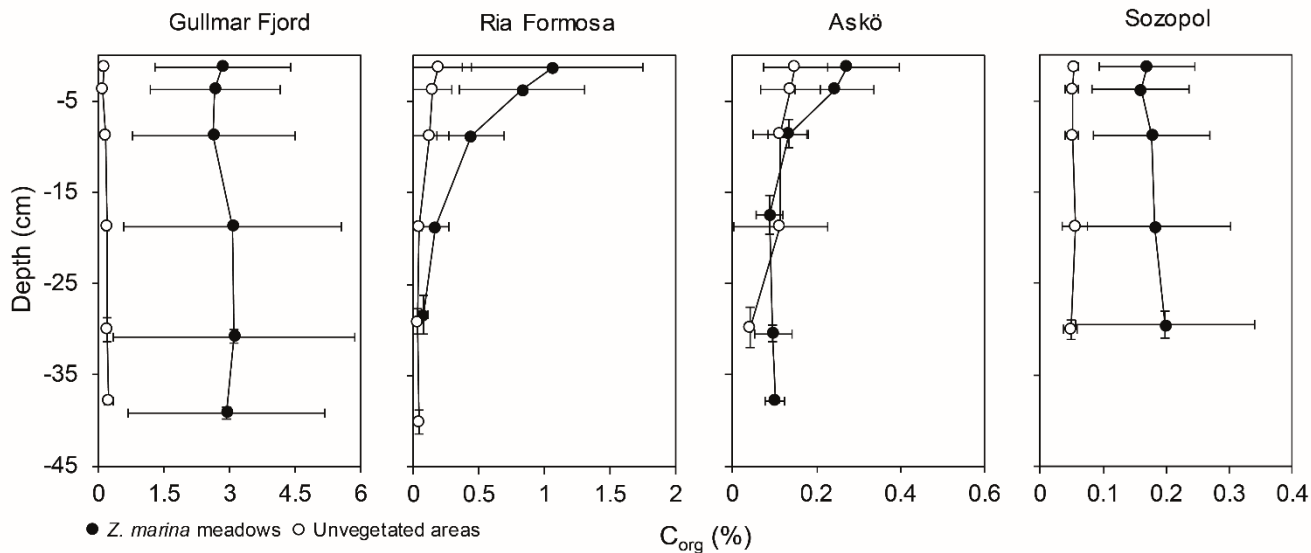

556  
 557 Figure 3. Mean sedimentary carbon ( $\% C_{org} \pm SD$ ) depth profiles grouped for the different regions showed as mean slice  
 558 depth. Note that the scale on the x-axes differs among the different depth profiles **due to large variation in carbon**  
 559 **content among areas.**  
 560

Table 3. Seagrass meadow variables (mean ± SD) for the different areas.

| Areas         | Shoot density<br>(m <sup>-2</sup> ) | Shoot<br>height (cm) | Seagrass<br>cover (%) | Aboveground biomass |           |            |                      | Belowground biomass |           |            |                      |
|---------------|-------------------------------------|----------------------|-----------------------|---------------------|-----------|------------|----------------------|---------------------|-----------|------------|----------------------|
|               |                                     |                      |                       | % C                 | % N       | C:N        | g DW m <sup>-2</sup> | % C                 | % N       | C:N        | g DW m <sup>-2</sup> |
| Gullmar Fjord | 157.9 ± 43.8                        | 81.4 ± 18.2          | 36.9 ± 14.0           | 38.8 ± 0.7          | 2.1 ± 0.3 | 18.4 ± 2.0 | 39.4 ± 31.1          | 34.2 ± 1.4          | 1.1 ± 0.1 | 30.2 ± 2.8 | 253.0 ± 86.0         |
| Ria Formosa   | 264.9 ± 107.8                       | 32.5 ± 4.4           | 79.1 ± 10.6           | 34.4 ± 1.2          | 1.4 ± 0.1 | 25.2 ± 1.2 | 108.3 ± 58.5         | 30.8 ± 3.2          | 1.1 ± 0.1 | 37.8 ± 4.5 | 494.2 ± 230.2        |
| Askö          | 338.1 ± 160.3                       | 51.7 ± 12.4          | 47.6 ± 18.1           | 37.2 ± 2.0          | 1.8 ± 0.3 | 20.9 ± 2.9 | 255.7 ± 193.4        | 32.8 ± 2.9          | 1.1 ± 0.1 | 31.5 ± 3.2 | 205.9 ± 88.7         |
| Sozopol       | 419.6 ± 315.3                       | 63.5 ± 11.2          | 63.5 ± 11.1           | 36.0 ± 1.3          | 1.9 ± 0.3 | 19.6 ± 3.2 | 122.0 ± 110.8        | 30.3 ± 3.0          | 0.8 ± 0.2 | 28.6 ± 5.7 | 86.4 ± 80.6          |

Table 4. Seagrass sediment data as mean ( $\pm$  SD for all variables except carbon content, which is presented with  $\pm$  SE) for the depth profile (0-25 cm) in the different areas. Mean grain size is presented with phi ( $\phi$ ) units.

| Areas         | % C <sub>org</sub> | g C <sub>org</sub> cm <sup>-2</sup> | Sediment porosity (%) | Sediment density (g DW mL <sup>-1</sup> ) | % N             | C:N             | Mean grain size ( $\phi$ ) | Sediment particles <0.074 mm (%) |
|---------------|--------------------|-------------------------------------|-----------------------|-------------------------------------------|-----------------|-----------------|----------------------------|----------------------------------|
| Gullmar Fjord | 2.79 $\pm$ 0.5     | 0.35 $\pm$ 0.041                    | 67.0 $\pm$ 14.1       | 0.71 $\pm$ 0.33                           | 0.28 $\pm$ 0.16 | 9.39 $\pm$ 1.26 | 4.89 $\pm$ 0.93            | 62.8 $\pm$ 25.6                  |
| Ria Formosa   | 0.61 $\pm$ 0.09    | 0.10 $\pm$ 0.012                    | 43.0 $\pm$ 5.4        | 1.13 $\pm$ 0.14                           | 0.08 $\pm$ 0.01 | 7.15 $\pm$ 0.83 | 2.34 $\pm$ 0.56            | 17.9 $\pm$ 5.8                   |
| Askó          | 0.18 $\pm$ 0.01    | 0.05 $\pm$ 0.005                    | 31.9 $\pm$ 2.4        | 1.4 $\pm$ 0.15                            | 0.03 $\pm$ 0.01 | 5.60 $\pm$ 1.27 | 1.19 $\pm$ 0.79            | 3.7 $\pm$ 0.6                    |
| Sozopol       | 0.17 $\pm$ 0.02    | 0.05 $\pm$ 0.009                    | 41.8 $\pm$ 5.2        | 1.25 $\pm$ 0.04                           | 0.05 $\pm$ 0.04 | 3.22 $\pm$ 1.25 | 2.08 $\pm$ 0.27            | 2.6 $\pm$ 1.9                    |

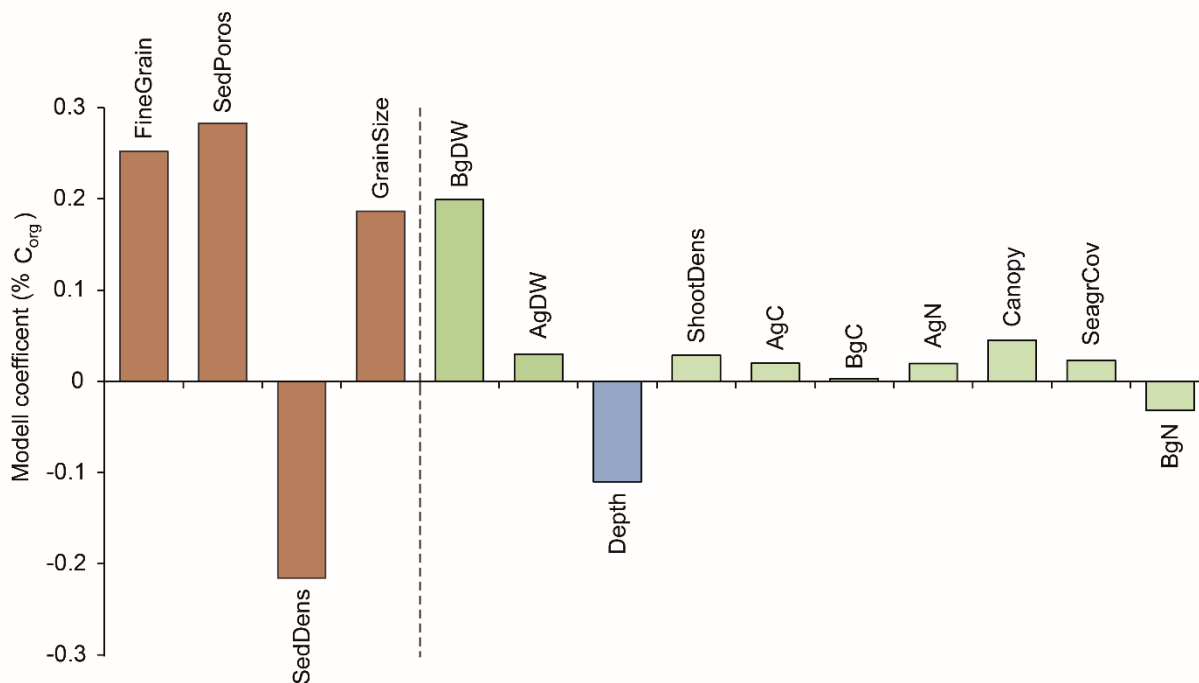

563

564 Figure 4. PLS (Partial Least Square) regression model coefficient plot for % C<sub>org</sub> in sediment (using a mean of the carbon  
 565 content for the top 25 cm sediment). The predictor variables are ranked in level of importance (left to right) where the four  
 566 variables left of the striped bar having a VIP-value >1 (i.e. FineGrain, SedPoros, SedDens and GrainSize) and hence  
 567 significantly influencing % C<sub>org</sub>. Brown = sediment characteristics, green = seagrass-associated variables and blue = water  
 568 depth; Variables included in the model were FineGrain (sediment particles <0.074 mm, %), SedPoros (sediment porosity,  
 569 %), SedDens (sediment density, g DW mL<sup>-1</sup>), GrainSize (mean grain size, φ), **Bg and Ag DW (belowground [roots and  
 570 rhizomes] and aboveground [shoots] biomass dry weight, m<sup>2</sup>)**, Depth (water depth, m), ShootDens (shoot density, m<sup>2</sup>), Ag  
 571 and Bg biomass C and N (biomass carbon and nitrogen content, %), Canopy (shoot height, cm) and SeagrCov (seagrass  
 572 cover, %).

573

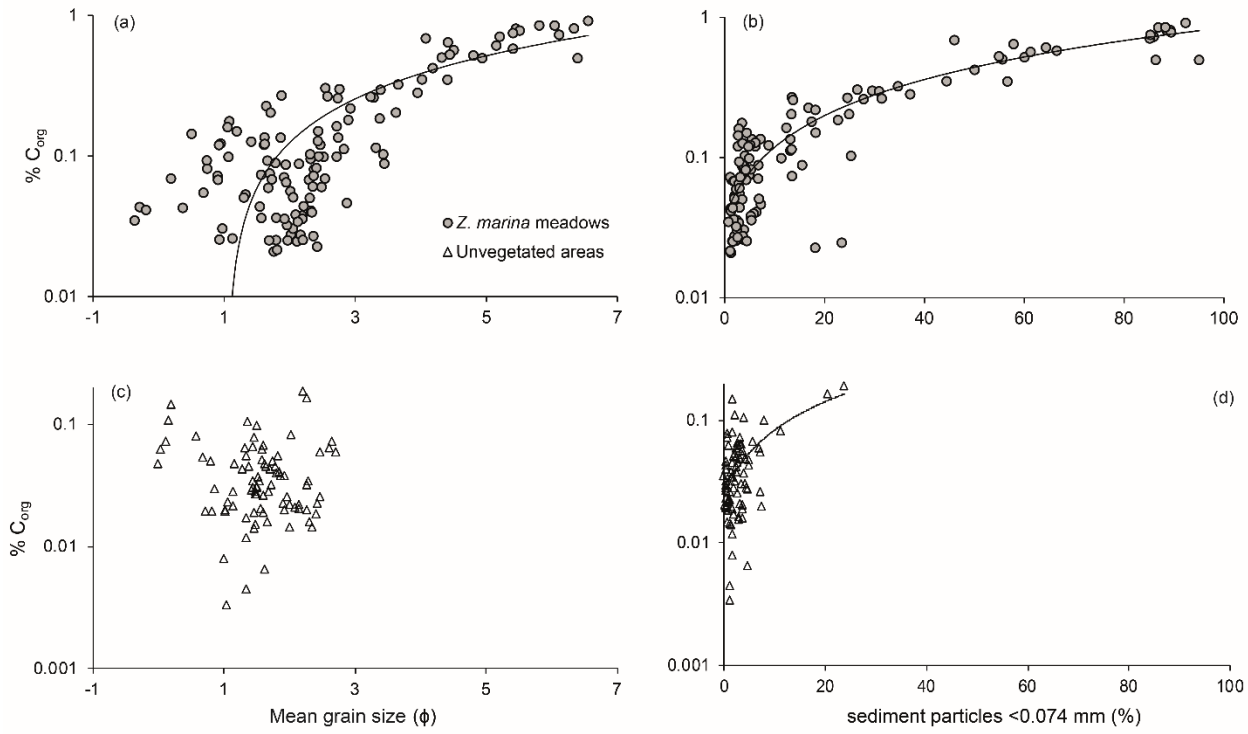

574

575 Figure 5. Semi-log plots ( $\log_{10}[x+1]$ ) showing the relationship between % C<sub>org</sub> and grain size. The % C<sub>org</sub> is presented with  
 576 a log scale as it gave the best fit of the models. Grain size is shown as mean grain size ( $\phi$ ) and sediment particles <0.074  
 577 mm (%) for *Z. marina* meadows (a and b) and unvegetated areas (c and d). The % C<sub>org</sub> was positively linked to both sediment  
 578 particles <0.074 mm (%) ( $R^2 = 0.91$ ,  $P < 0.001$ ) and mean grain size ( $\phi$ ) ( $R^2 = 0.74$ ,  $P < 0.001$ ) for *Z. marina* meadows but  
 579 for unvegetated area only sediment particles < 0.074 mm (%) showed this relationship with % C<sub>org</sub> ( $R^2 = 0.42$ ,  $P < 0.001$ ).

580



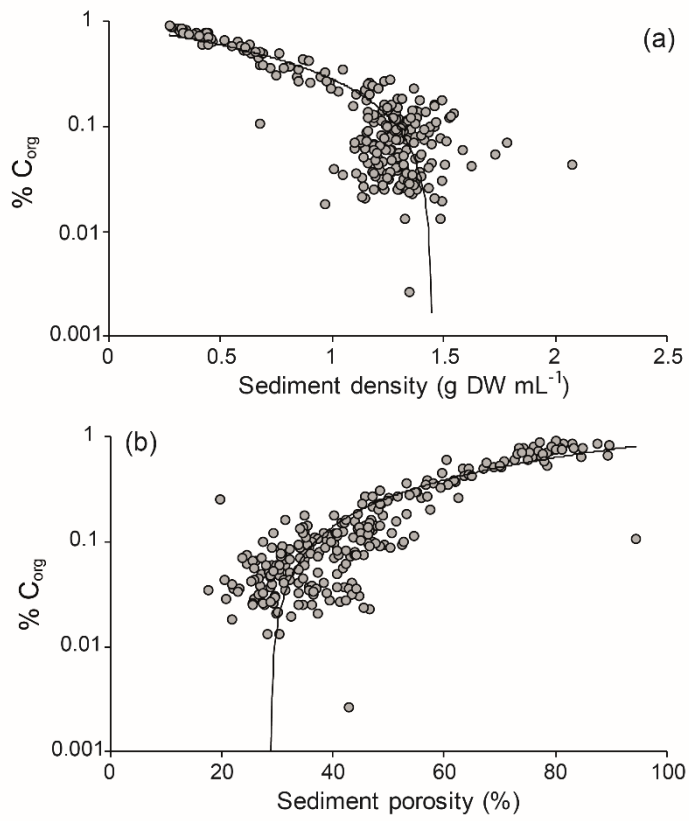

581

582 Figure 6. Semi-log plots ( $\log_{10}[x+1]$ ) for sediment density (a) and sediment porosity (b) in relation to % C<sub>org</sub> for the *Z. marina*  
583 sites. The sediment density (g DW mL<sup>-1</sup>) was negatively influencing the amount of organic carbon ( $R^2 = 0.84, P < 0.001$ ),  
584 while there was a positive relation between sediment porosity (%) and % C<sub>org</sub> ( $R^2 = 0.80, P < 0.001$ ).

585

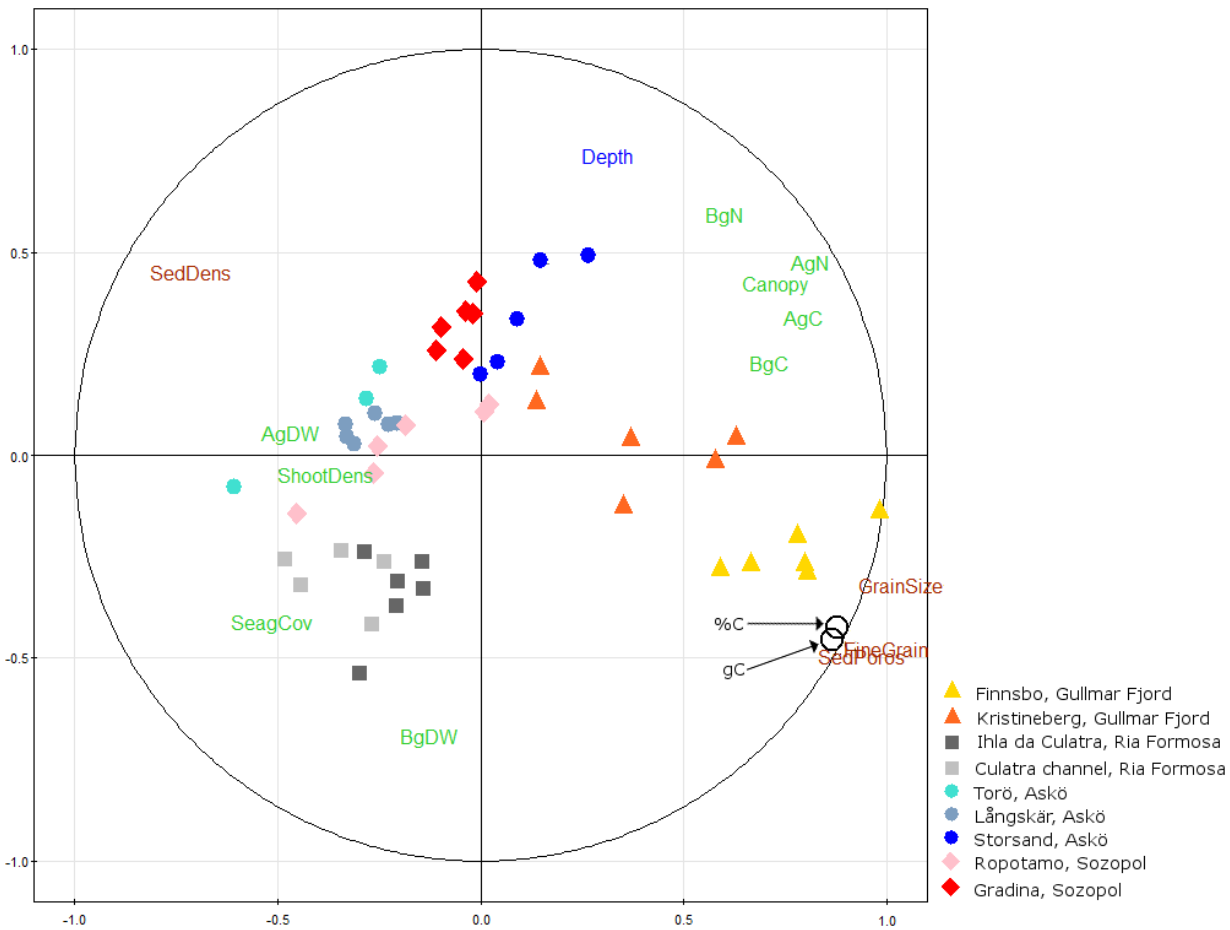

586

587 Figure 7. PCA (Principal Component Analysis) showing the nine seagrass sites, the two response variables (sedimentary %  
 588  $C_{org}$  and  $g C_{org} cm^{-2}$ ) and predictor variables (14 in total). The percent organic carbon ( $\% C_{org}$ ) is presented as a mean of the  
 589 content of the top 25 cm sediment, while carbon per unit area ( $g C_{org} cm^{-2}$ ) is the total (accumulated) amount of carbon in  
 590 the top 25 cm of sediment. The colors of the letters represent different groups of predictor variables; brown = sediment  
 591 characteristics, green = seagrass-associated variables, blue = water depth. Black circles are the response variables, i.e.  
 592 organic carbon ( $\%C = \% C_{org}$  and  $gC = g C_{org} cm^{-2}$ ). For explanations to the abbreviations of predictor variables see Fig. 4.

593

Table 5. Summary of literature data on organic carbon (% C<sub>org</sub>) and % OM (organic matter) content in seagrass sediment in Europe and USA. In studies were only % OM was presented a conversion factor of 0.43 was used to convert % OM to % C<sub>org</sub> as calculated by Fourqurean *et al.* (2012) for seagrass sediment with <0.2 %OM. All studies have determined % OM to % C<sub>org</sub> by LOI (Loss on ignition) or using a CN elemental analyzer except <sup>a</sup> where dichromate titration was used (Gaudette *et al.* 1974).

| Area                 | Countries       | Longitude (N) | Sediment core depth (cm) | C <sub>org</sub> (%) ± SD | OM (%) ± SD  | Water depth (m) ± SD | Sites <sup>1</sup> | References                                                                                               |
|----------------------|-----------------|---------------|--------------------------|---------------------------|--------------|----------------------|--------------------|----------------------------------------------------------------------------------------------------------|
| Norwegian Sea        | Norway          | 63°21'        | 0-10                     | 0.49*                     |              | 8.0                  | 1                  | Fredriksen <i>et al.</i> , 2010                                                                          |
|                      | Sweden          | 57°48'-59°00' | 0-5                      | 5.67 ± 3.92*              | 25.2*        | 2.0 ± 0.4            | 50                 | Jephson <i>et al.</i> , 2009*, Gullström <i>et al.</i> 2012                                              |
| Skagerrak            | Sweden          | 58°14'-58°17' | 0-5                      | 2.74 ± 1.49               |              | 2.9 ± 0.9            | 2                  | <b>This study</b>                                                                                        |
|                      | Norway          |               | 0-10                     | 0.68 ± 0.38*              |              | 4.0                  | 3                  | Fredriksen <i>et al.</i> , 2010                                                                          |
| Kattegat             | Denmark         | 54°58'-56°49' | 0-5                      | 1.68 ± 2.05*              | 4.13 ± 5.14* | 2.7 ± 0.10           | 11                 | Boschker <i>et al.</i> , 2000, Röhr <i>et al.</i> , 2016*                                                |
|                      |                 |               | 11-15                    | 0.54 ± 0.60*              | 1.26 ± 1.41  | 2.3 ± 2.0            | 6                  | Fredriksen <i>et al.</i> , 2006, Holmer & Laursen 2002, Holmer <i>et al.</i> 2006                        |
| Baltic Sea           | Sweden, Finland | 55°23'-60°21' | 0-5                      | 0.46 ± 0.30*              | 1.07 ± 0.69  | 2.3 ± 0.7            | 13                 | Jerling and Lindhe, 1976, Jephson <i>et al.</i> , 2009, Röhr <i>et al.</i> , 2016                        |
|                      | Sweden          | 58°49'        | 0-5                      | 0.26 ± 0.11               |              | 3.8 ± 1.1            | 3                  | <b>This study</b>                                                                                        |
| North Sea            | Sweden, Finland | 55°23'-60°21' | 8-10                     | 0.36 ± 0.30*              | 0.86 ± 0.70  | 3.3 ± 0.9            | 14                 | Boström <i>et al.</i> , 2006                                                                             |
|                      | Netherlands     | 51°34'-53°25' | 0-5                      | 0.73                      |              | Intertidal           | 1                  | Boschker <i>et al.</i> , 2006                                                                            |
| Black sea            |                 |               | 0-20                     | 0.90 ± 0.60*              | 2.10 ± 1.40  | -                    | 5                  | van Katwijk <i>et al.</i> , 2010                                                                         |
|                      | Bulgaria        | 42°19'-42°22' | 0-5                      | 0.16 ± 0.07               |              | 4.2 ± 1.6            | 2                  | <b>This study</b>                                                                                        |
| North Atlantic Ocean | France, USA     | 34°43'-44°42' | 0-5                      | 1.92 ± 2.15*              | 4.59 ± 5.60* | 2.1 ± 0.9            | 9                  | Fonesca <i>et al.</i> , 1984*, Boschker <i>et al.</i> , 2006, Kenworthy <i>et al.</i> , 2014*, Dale 1974 |
|                      | USA             |               | 11-21                    | 2.08                      |              | Intertidal           | 1                  | Dale 1974                                                                                                |
| Mediterranean        | Portugal        | 36°59'-37°00' | 0-5                      | 0.94 ± 0.59               |              | 1.3 ± 1.0            | 2                  | <b>This study</b>                                                                                        |
|                      | Spain           | 36°44'        | 0-5                      | 0.90*                     | 2.30         | 13                   | 1                  | Rueda and Salas 2008                                                                                     |

<sup>a</sup>Dichromate titration method (Gaudette *et al.* 1974)

<sup>1</sup>Number of meadows for each area and sediment core depth.

\*Studies presenting % OM if both % C<sub>org</sub> and % OM are included on the same row.

<sup>†</sup>Converted values (partly or all) from % OM to % C<sub>org</sub> (conversion factor: 0.43)

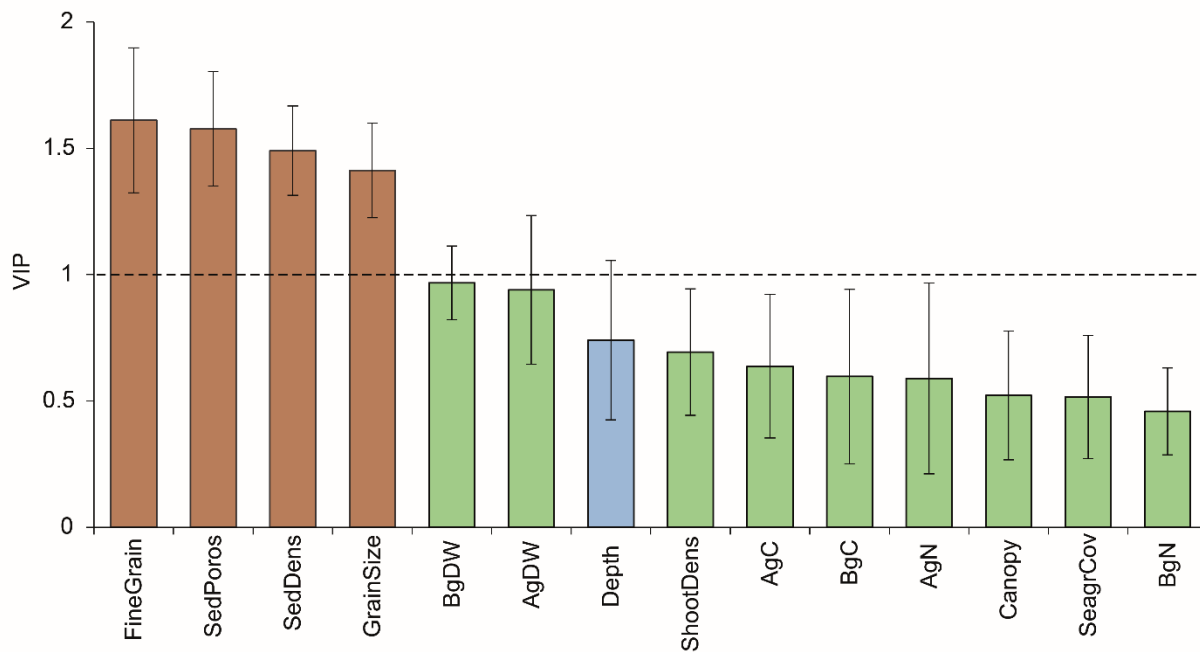

595

596 Figure S1. VIP-values (variance of importance) for independent variables used in the PLS model testing relationships to  
 597 carbon content (mean % C for the top 25 cm sediment). The variables are listed in the level of importance and those with  
 598 VIP-values >1 (dashed line) has a significant influence on the model. Brown = sediment characteristics, green = seagrass-  
 599 associated variables and blue = water depth. FineGrain (sediment particles <0.074 mm, %), SedPoros (sediment porosity,  
 600 %), SedDens (sediment density, g DW mL<sup>-1</sup>), GrainSize (mean grain size, φ), Bg and Ag DW (belowground biomass dry  
 601 weight, m<sup>2</sup>), Depth (water depth, m), ShootDens (shoot density, m<sup>2</sup>), Ag and Bg biomass C and N (biomass carbon and  
 602 nitrogen content, %), Canopy (shoot height, cm), SeagrCov (seagrass cover, %) were used as predictor variables.

603

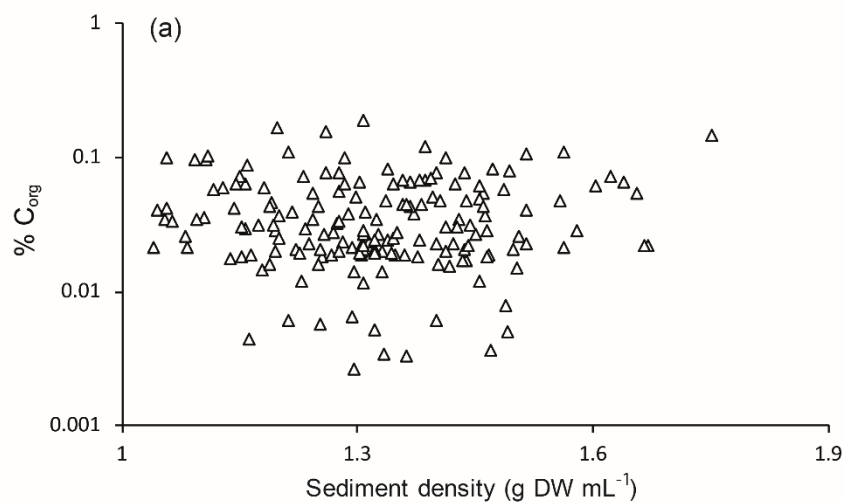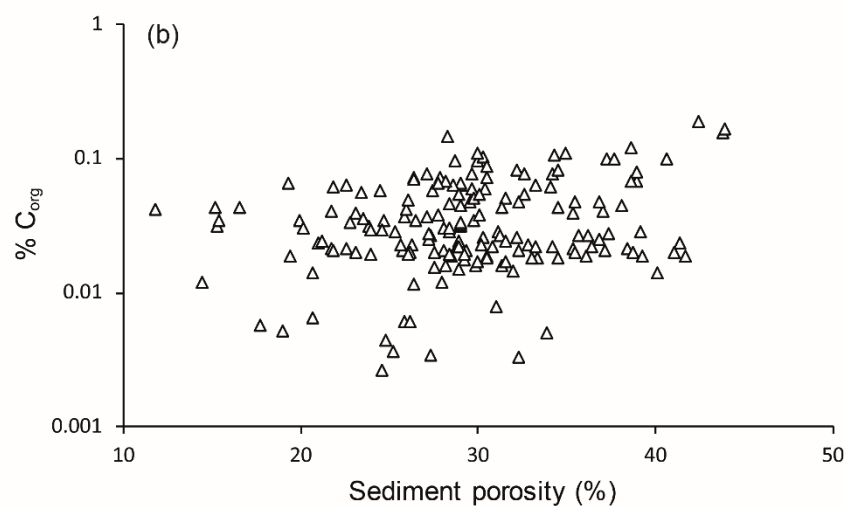

604

605 Figure S2. Semi-log plots ( $\log_{10}[x+1]$ ) for sediment density ( $\text{g DW mL}^{-1}$ ) (a), and sediment porosity (%) (b) in relation to  
 606 organic carbon content (%  $C_{\text{org}}$ ) for unvegetated areas. There was no significant relationship between sediment density  
 607 and organic carbon. The sediment porosity was, however, positively linked to sedimentary organic carbon but had a low  
 608  $R^2$ -value (linear regression,  $R^2 = 0.08$ ,  $P < 0.001$ ).
